# Supplementary material for: Synergetic Effect of Li-Ion Concentration and Triple Doping on Ionic Conductivity of Li7La3Zr2O12 Solid Electrolyte
Source: MDPI journal article supplement (doi:10.3390/nano12172946), 2022-08-26
Supplement: s1 [file s1]

# *Supporting Information*

## **Synergetic Effect of Li-Ion Concentration and Triple Doping on Ionic Conductivity of $\text{Li}_7\text{La}_3\text{Zr}_2\text{O}_{12}$ Solid Electrolyte**

**Minh Hai Nguyen and Sangbaek Park \***

Department of Materials Science and Engineering, Chungnam National University,  
Daejeon 34134, Korea

\* Correspondence: sb.park@cnu.ac.kr

**Table S1.** Average particle size of Al/Ga/Ta-doped LLZO powders prepared with different ball milling parameters through PSA measurement.

| Sample   | 1 <sup>st</sup> ball milling conditions | Calcination  | 2 <sup>nd</sup> ball milling conditions | Average particle size (μm) |
|----------|-----------------------------------------|--------------|-----------------------------------------|----------------------------|
| AGT_LLZO | 250 rpm / 6 h                           | -            | -                                       | 1.03                       |
|          | 250 rpm / 6 h                           | 900 °C / 6 h | -                                       | 24.4                       |
|          | 250 rpm / 6 h                           | 900 °C / 6 h | 200 rpm / 2 h                           | 1.66                       |
|          | 250 rpm / 6 h                           | 900 °C / 6 h | 300 rpm / 2 h                           | 1.05                       |
|          | 250 rpm / 6 h                           | 900 °C / 6 h | 400 rpm / 2 h                           | 1.12                       |
|          | 250 rpm / 6 h                           | 900 °C / 6 h | 500 rpm / 2 h                           | 0.78                       |

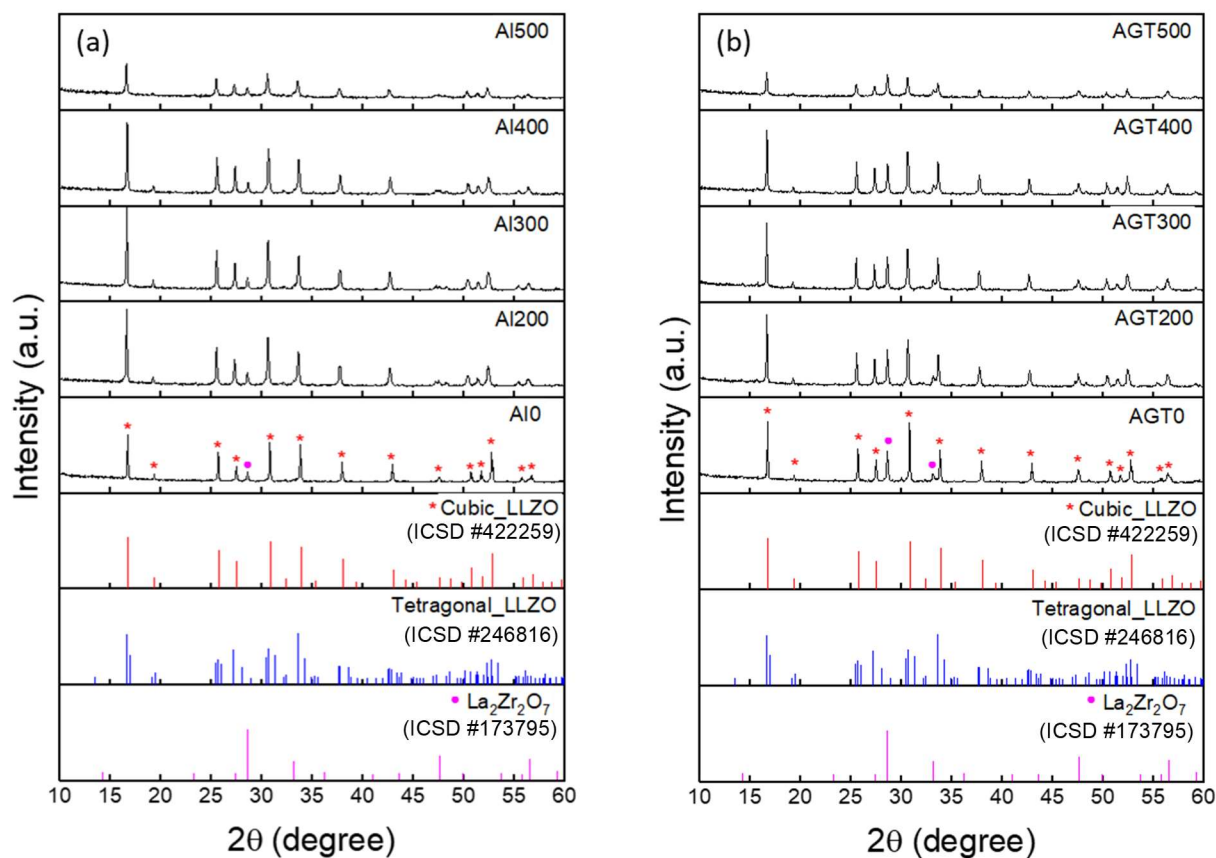

**Figure S1:** XRD patterns of (a) Al-doped LLZO powders and (b) Al/Ga/Ta-doped LLZO powders after the second ball milling process with different rotation speeds (0, 200, 300, 400, and 500 rpm).

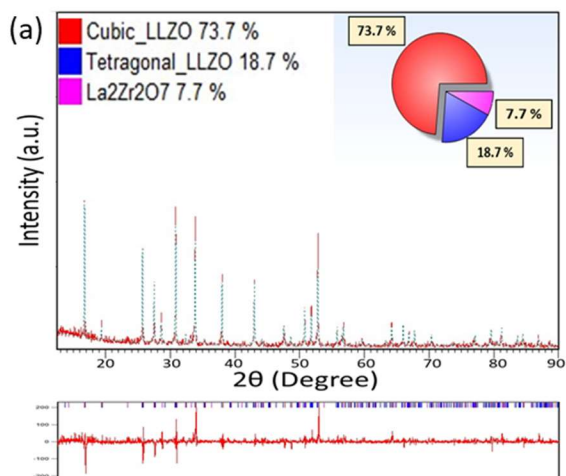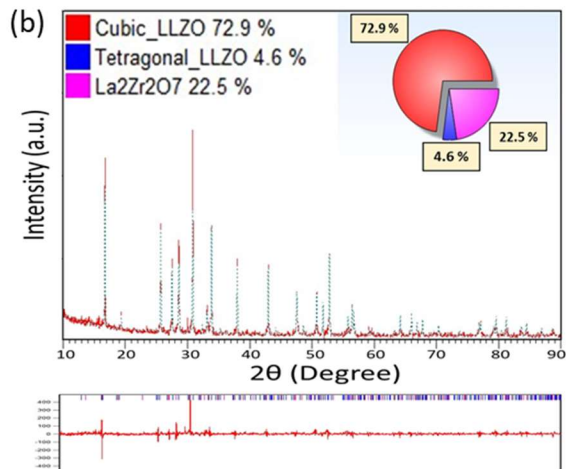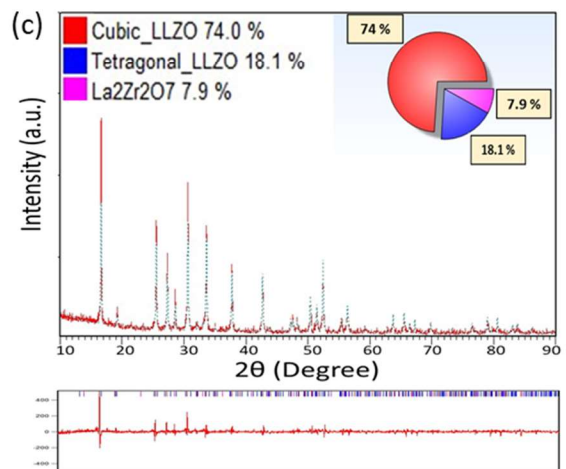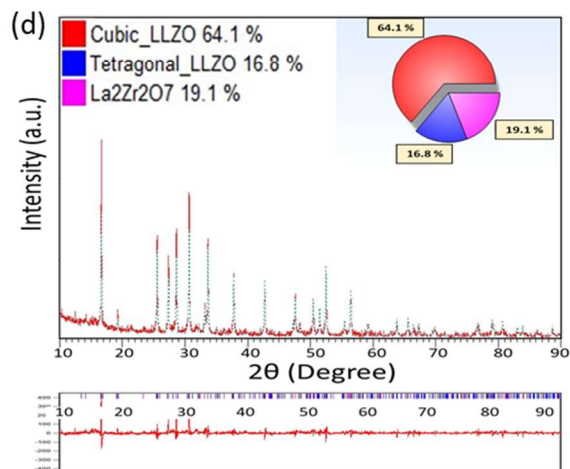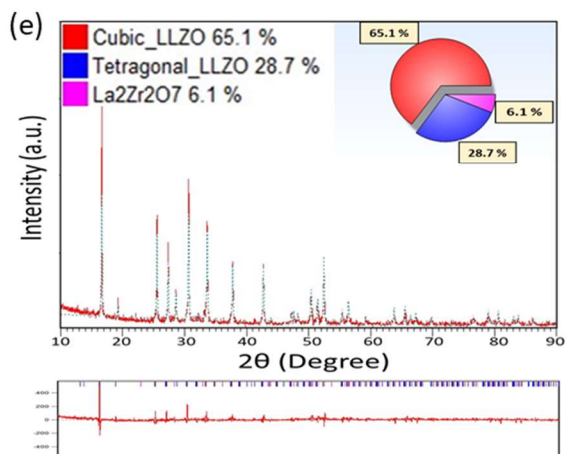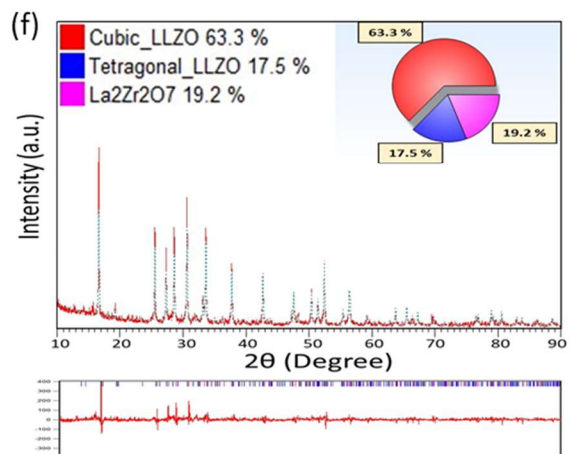

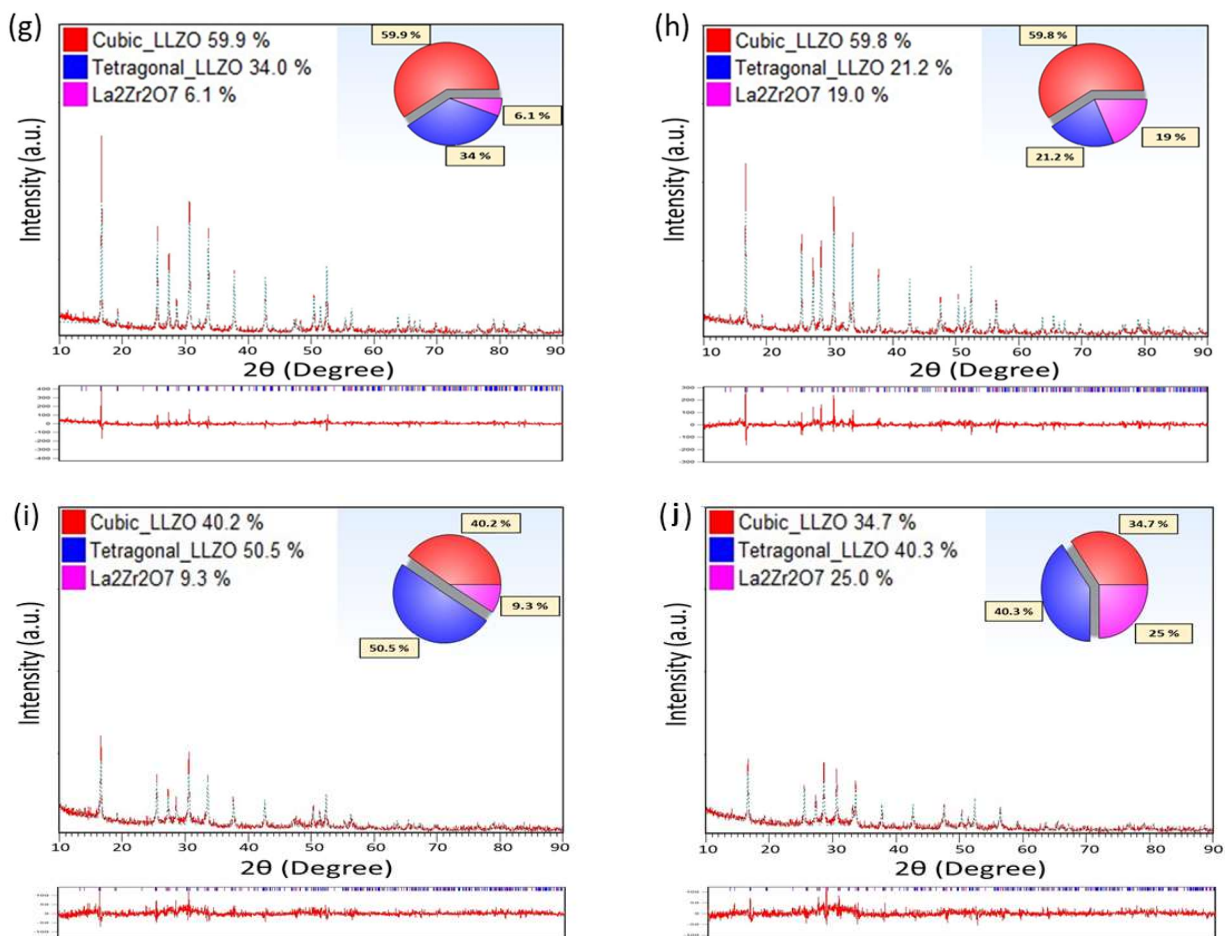

**Figure S2:** XRD Rietveld refinement results of Al-doped LLZO and AGT-doped LLZO powders prepared with Li content of 6.9 mol after the second ball milling process with different rotation speeds (0, 200, 300, 400 and 500 rpm): (a) Al0, (b) AGT0, (c) Al200, (d) AGT200, (e) Al300, (f) AGT300, (g) Al400, (h) AGT400, (i) Al500, and (j) AGT500.

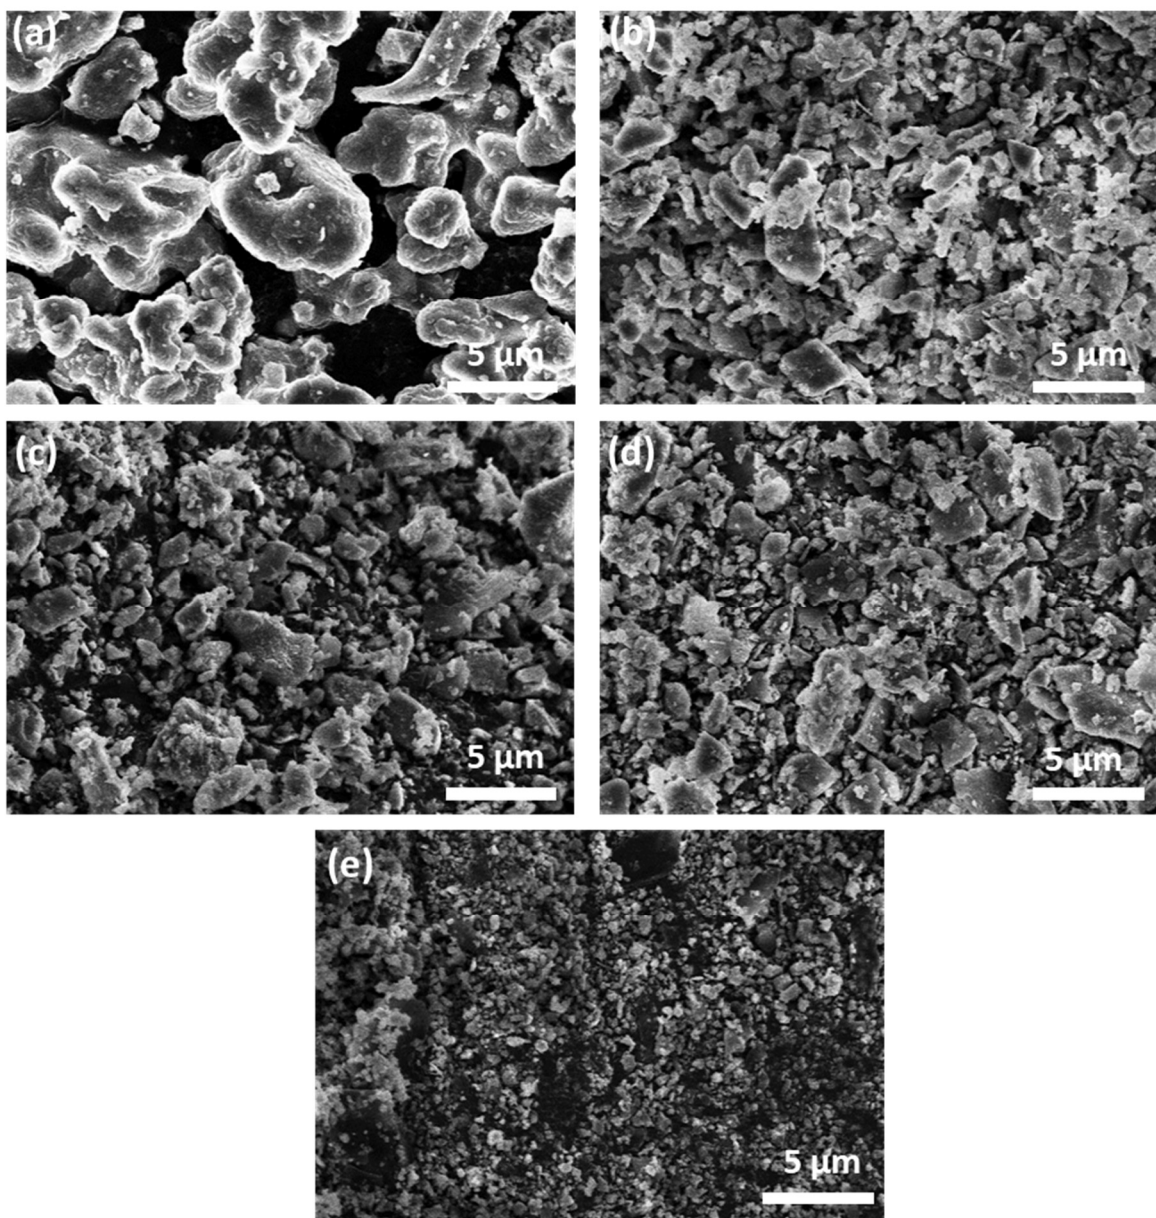

**Figure S3:** SEM images of the Al/Ga/Ta-doped LLZO powders after the second ball milling process at (a) 0 rpm, (b) 200 rpm, (c) 300 rpm, (d) 400 rpm, and (e) 500 rpm for 2 h.

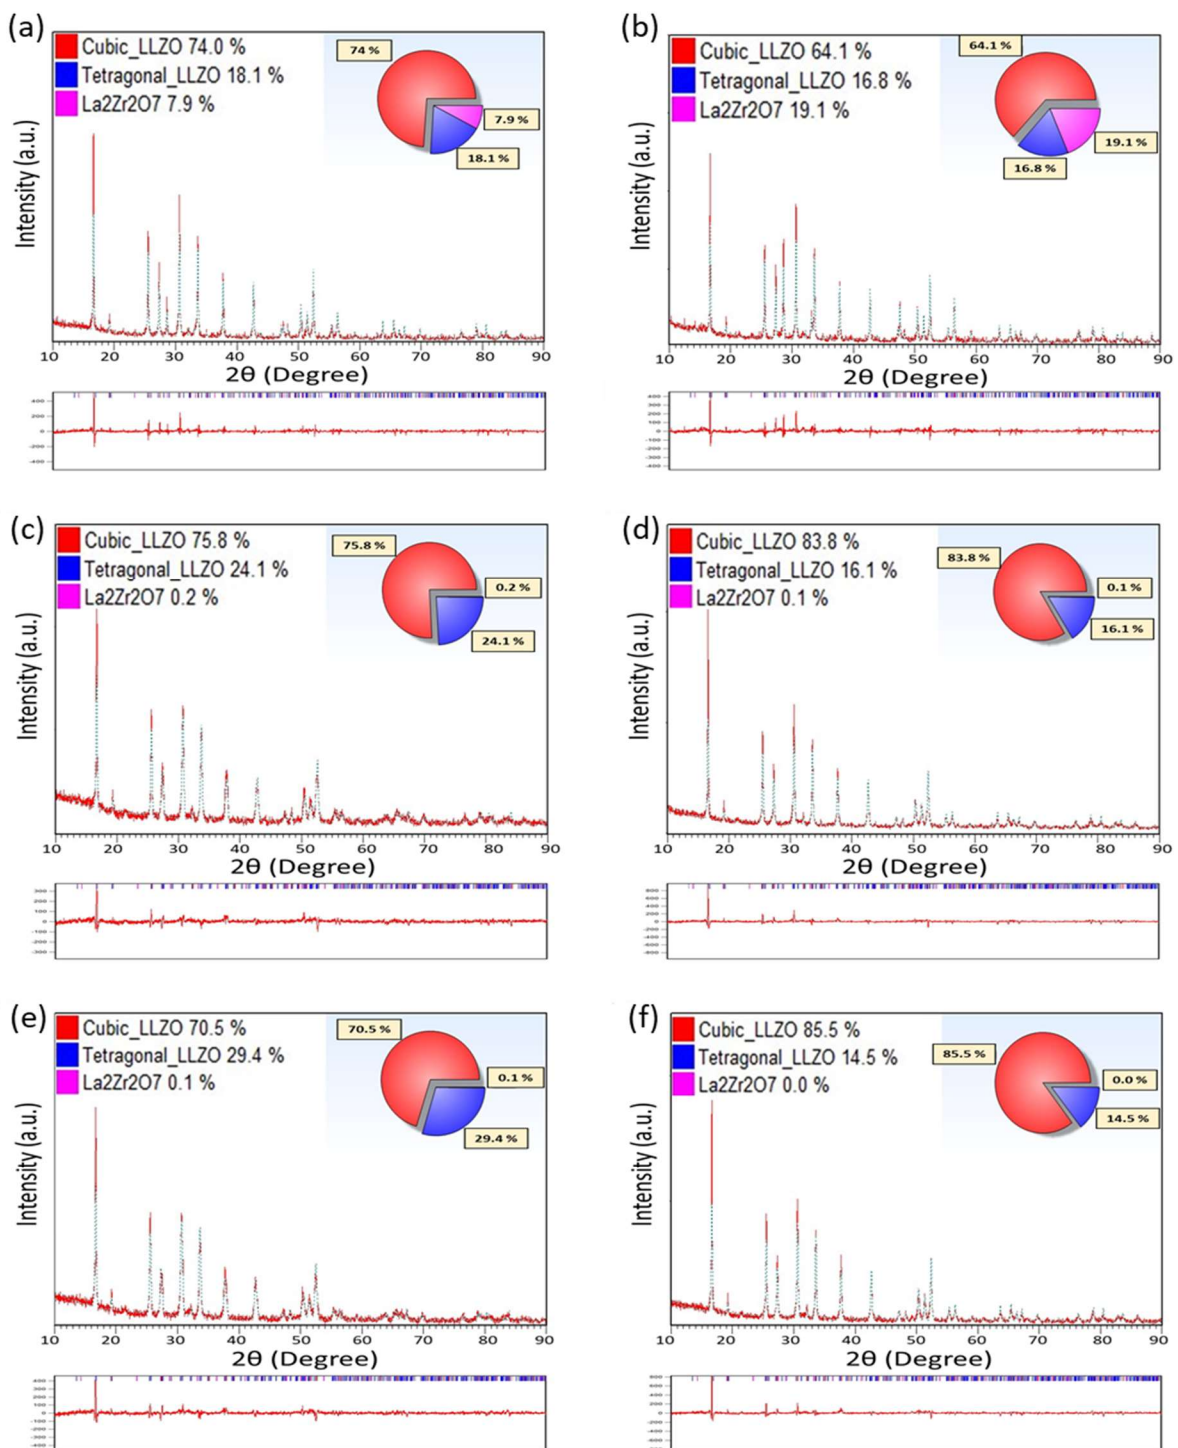

**Figure S4:** XRD Rietveld refinement results of powder samples after the second ball milling process at 200 rpm for 2 h: (a) Al<sub>6.9</sub>, (b) AGT<sub>6.9</sub>, (c) Al<sub>7.7</sub>, (d) AGT<sub>7.7</sub>, (e) Al<sub>8.4</sub>, and (f) AGT<sub>8.4</sub>.



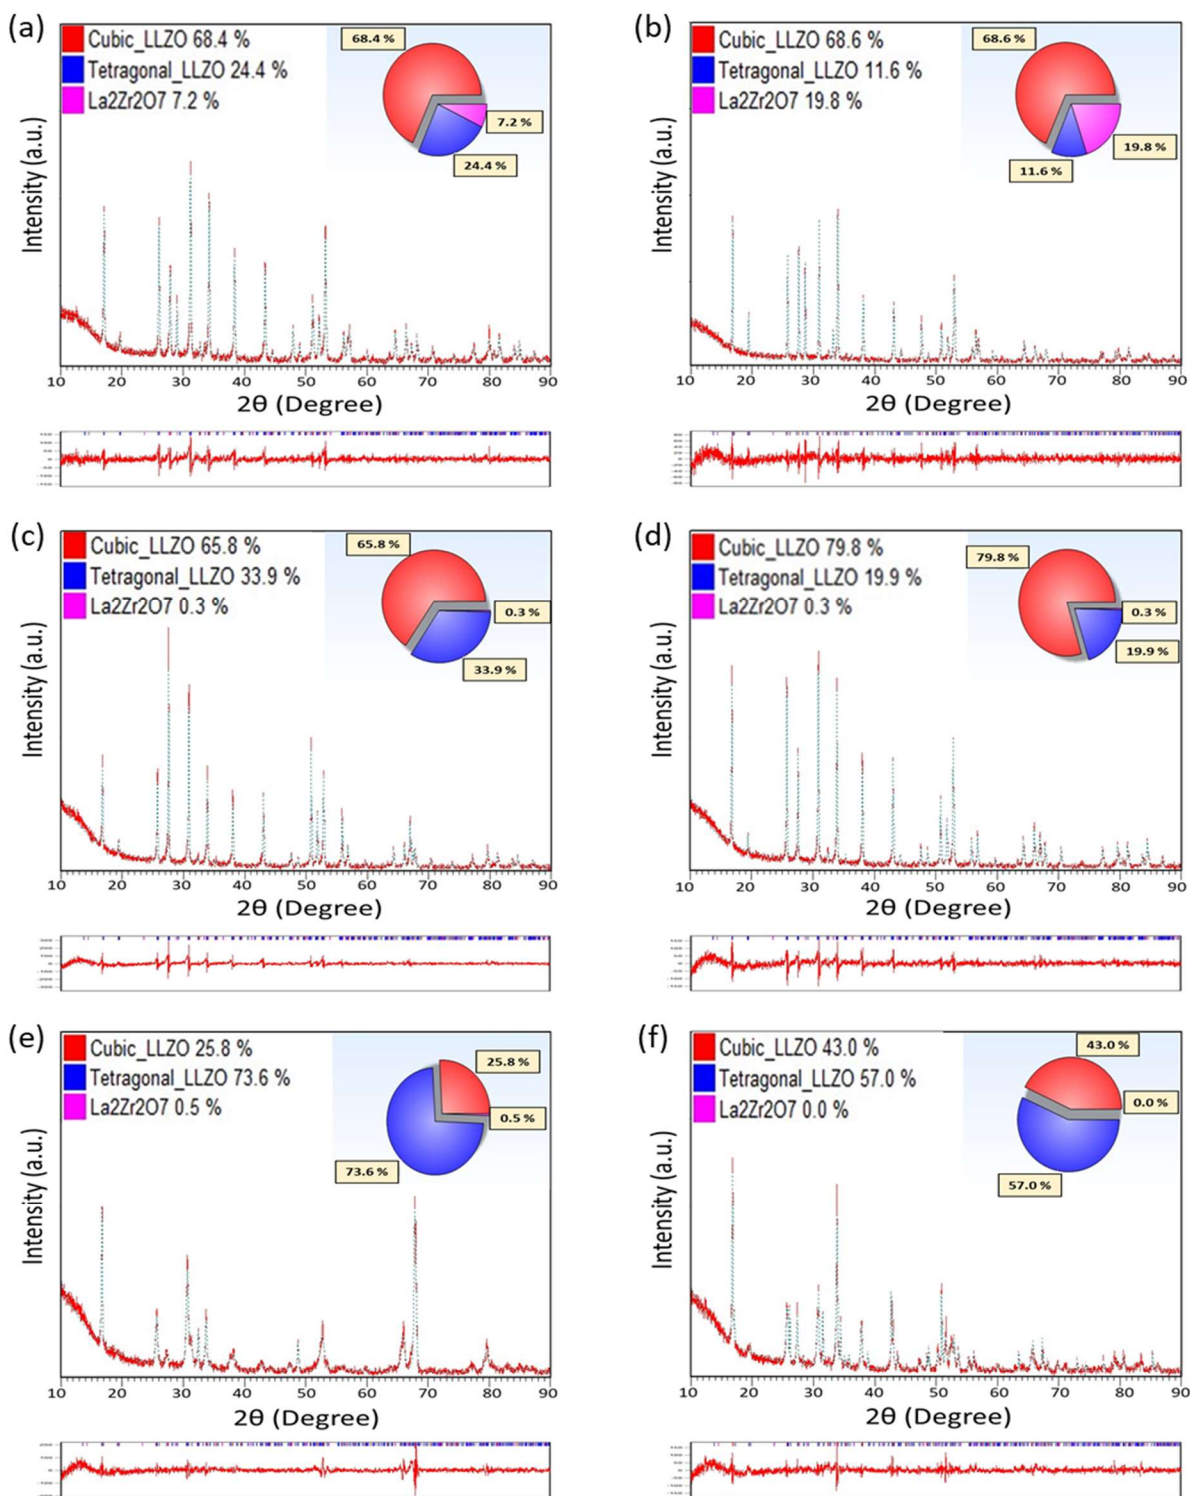

**Figure S5:** XRD Rietveld refinement results of pellets: (a) Al<sub>6.9</sub>, (b) AGT<sub>6.9</sub>, (c) Al<sub>7.7</sub>, (d) AGT<sub>7.7</sub>, (e) Al<sub>8.4</sub>, and (f) AGT<sub>8.4</sub>.



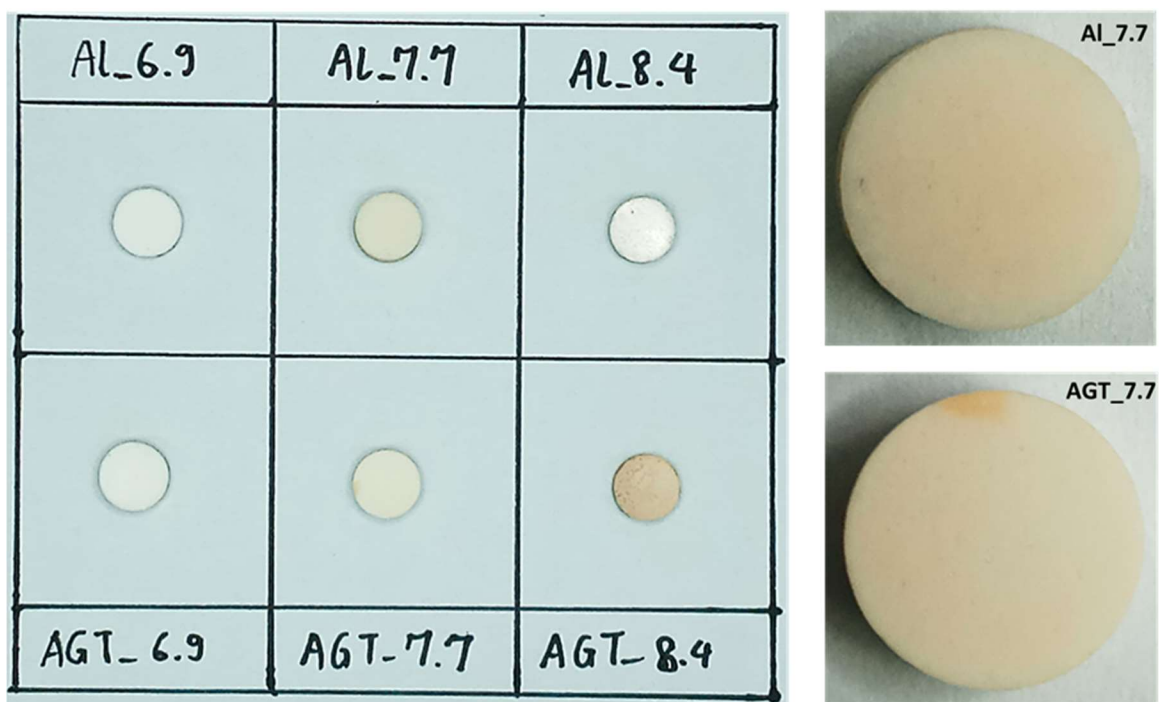

Figure S6: Digital image of pellets.

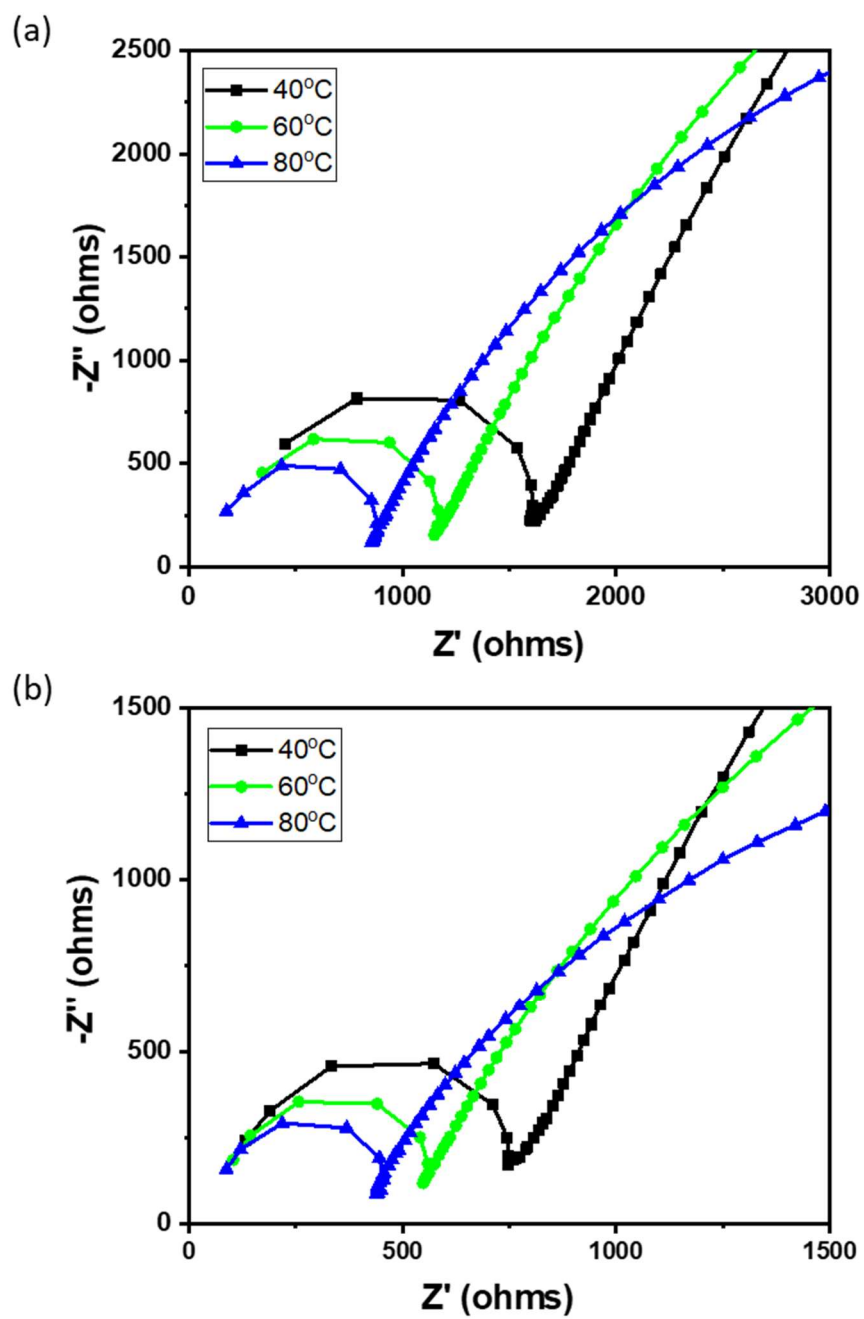

Figure S7: Nyquist plots of (a) Al<sub>7.7</sub> and (b) AGT<sub>7.7</sub> samples at 40–80 °C

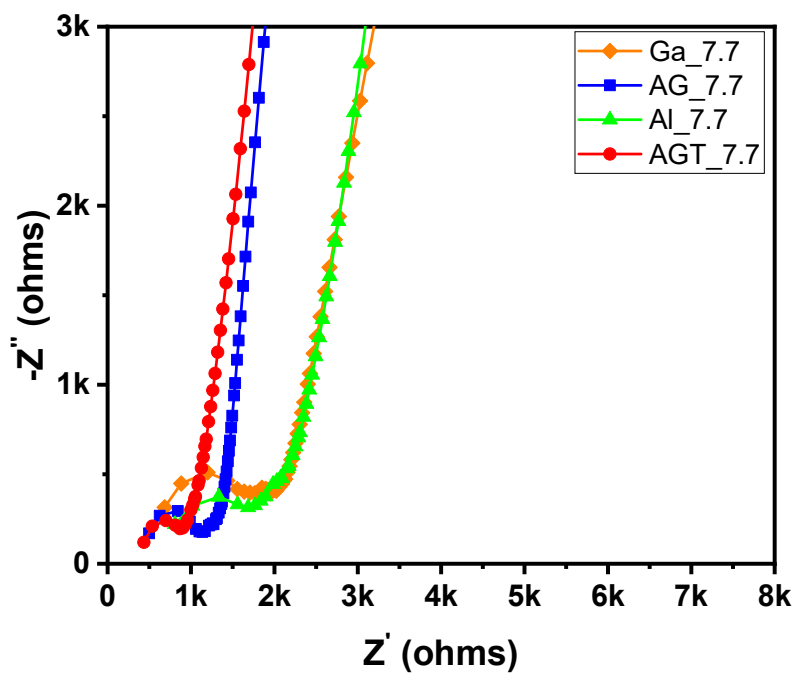

**Figure S8:** Nyquist plots of Al-doped LLZO, Ga-doped LLZO, Al/Ga-doped LLZO, and Al/Ga/Ta-doped LLZO pellets with  $\text{Li}^+$  concentration of 7.7 mol.

**Table S2:** Summary of total ionic conductivity at 25 °C of Al-doped LLZO, Ga-doped LLZO, Al/Ga-doped LLZO, and Al/Ga/Ta-doped LLZO pellets with Li<sup>+</sup> concentration of 7.7 mol.

| Sample                                                      | Al_7.7 | Ga_7.7 | AG_7.7 | AGT_7.7 |
|-------------------------------------------------------------|--------|--------|--------|---------|
| Ion conductivity<br>( $\times 10^{-4}$ S cm <sup>-1</sup> ) | 1.7    | 2.0    | 3.2    | 3.6     |

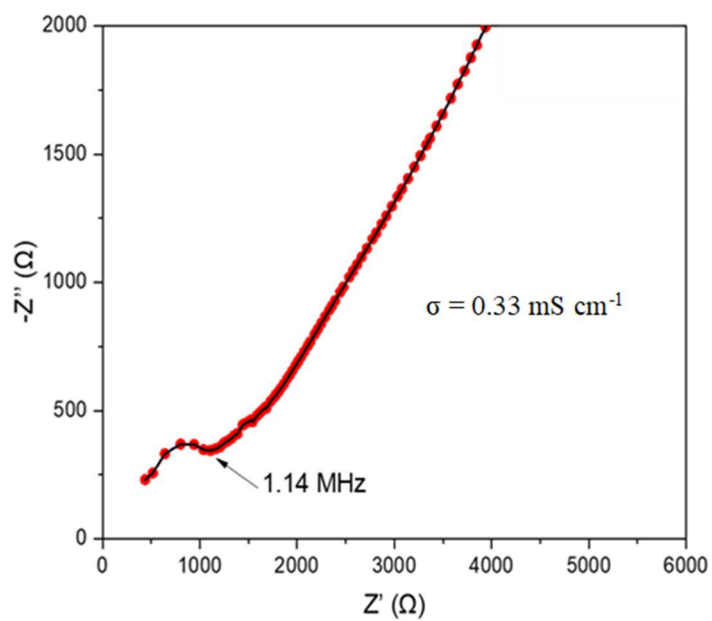

**Figure S9:** Nyquist plots of Al-doped LLZO prepared with  $\text{Li}^+$  concentration of 7.7 mol and sintering time of 24 h.

**Table S3:** Comparison of LLZO pellets prepared by fast sintering methods in this work and other studies.

| Composition                                                                               | Sintering method                                                      | Sintering temperature (°C) | Sintering time | Ionic conductivity at 25 °C (mS cm <sup>-1</sup> ) | Reference |
|-------------------------------------------------------------------------------------------|-----------------------------------------------------------------------|----------------------------|----------------|----------------------------------------------------|-----------|
| $\text{Li}_{6.45}\text{Al}_{0.05}\text{La}_3\text{Zr}_{1.6}\text{Ta}_{0.4}\text{O}_{12}$  | Ultrafast High-temperature Sintering (UHS) with an AC/DC power source | 1500                       | 10 s           | 0.12                                               | [36]      |
| $\text{Li}_{6.4}\text{La}_3\text{Zr}_{1.4}\text{Ta}_{0.6}\text{O}_{12}$                   | Furnace sintering (using Pt crucibles)                                | 1250                       | 40 min         | 0.64                                               | [32]      |
| $\text{Li}_{6.5}\text{La}_3\text{Zr}_{1.45}\text{Ta}_{0.55}\text{O}_{12}$                 | Sintering with DC power supply and volatile fillers                   | 1327                       | 20 s           | 1.09                                               | [38]      |
| $\text{Li}_{6.15}\text{La}_3\text{Zr}_{1.75}\text{Ta}_{0.25}\text{Al}_{0.2}\text{O}_{12}$ | Hot pressing                                                          | 1000                       | 1 h            | 0.4                                                | [31]      |
| $\text{Li}_{6.15}\text{La}_3\text{Zr}_{1.75}\text{Ta}_{0.25}\text{Al}_{0.2}\text{O}_{12}$ | Hot pressing                                                          | 1050                       | 1 h            | 0.37                                               | [18]      |
| $\text{Li}_{6.5}\text{La}_3\text{Zr}_{1.5}\text{Ta}_{0.5}\text{O}_{12}$                   | Spark plasma sintering                                                | 1000                       | 10 min         | 0.69                                               | [37]      |



|                                                                                                                |                      |      |        |      |              |
|----------------------------------------------------------------------------------------------------------------|----------------------|------|--------|------|--------------|
| $\text{Li}_{6.25}\text{Al}_{0.25}\text{La}_3\text{Zr}_2\text{O}_{12}$                                          | Furnace<br>sintering | 1250 | 40 min | 0.17 | This<br>work |
| $\text{Li}_{6.25}\text{Al}_{0.25}\text{La}_3\text{Zr}_2\text{O}_{12}$                                          | Furnace<br>sintering | 1250 | 24 h   | 0.33 | This<br>work |
| $\text{Li}_{6.25}\text{Al}_{0.172}\text{Ga}_{0.072}\text{La}_3\text{Zr}_{1.982}\text{Ta}_{0.018}\text{O}_{12}$ | Furnace<br>sintering | 1250 | 40 min | 0.36 | This<br>work |
